# Supplementary material for: Comparison of 3D non-fullerene acceptors for organic photovoltaics based on naphthalene diimide and perylene diimide-substituted 9,9′-bifluorenylidene
Source: Royal Society of Chemistry journal article supplement (doi:10.1039/c6ra12396a), 2016-01-01
Supplement: c6ra12396a1.pdf [file c6ra12396a1.pdf]

## **Electronic Supplementary Information**

**Comparison of 3D non-fullerene acceptors for organic photovoltaics based on naphthalene diimide and perylene diimide-substituted 9,9'-bifluorenylidene**

Yeli Fan, Stephen Barlow, Siyuan Zhang, Baoping Lin and Seth R. Marder

## 1. Optimization of devices

**Table S1** Photovoltaic performance of PTB7-Th:BF-PDI<sub>4</sub> based solar cells. The average values are from over eight devices. The D:A ratio is 1:1.5 (w/w).

| Film treat       | $J_{sc}$ (mA/cm <sup>2</sup> ) | $V_{oc}$ (V) | FF (%)     | $\eta$ (%) | Best (%) |
|------------------|--------------------------------|--------------|------------|------------|----------|
| none             | 8.93±0.13                      | 0.78±0.01    | 42.68±1.31 | 2.99±0.1   | 3.17     |
| 1% CN            | 9.58±0.23                      | 0.80±0.01    | 40.48±0.83 | 3.12±0.06  | 3.24     |
| 2% CN            | 9.32±0.36                      | 0.81±0.01    | 42.92±0.90 | 3.24±0.11  | 3.40     |
| 3% CN            | 9.35±0.26                      | 0.82±0.01    | 45.55±0.80 | 3.50±0.06  | 3.64     |
| 1% DIO           | 8.55±0.19                      | 0.82±0.01    | 45.95±0.17 | 3.23±0.09  | 3.33     |
| 2% DIO           | 8.31±0.16                      | 0.82±0.00    | 46.17±0.61 | 3.14±0.06  | 3.23     |
| 1% DIO+1% CN     | 9.02±0.21                      | 0.82±0.01    | 45.84±0.33 | 3.40±0.07  | 3.48     |
| 1% DIO+2% CN     | 8.13±0.09                      | 0.82±0.01    | 45.47±0.34 | 3.04±0.03  | 3.09     |
| 1.5% DIO+1.5% CN | 7.18±0.16                      | 0.84±0.00    | 42.84±0.37 | 2.58±0.04  | 2.63     |

**Table S2** Photovoltaic performance of PTB7-Th:BF-NDI<sub>4</sub> based solar cells. The average values are from over eight devices. The D:A ratio is 1:1.5 (w/w).

| Film treat   | $J_{sc}$ (mA/cm <sup>2</sup> ) | $V_{oc}$ (V) | FF (%)     | $\eta$ (%) | Best (%) |
|--------------|--------------------------------|--------------|------------|------------|----------|
| none         | 5.75±0.15                      | 0.82±0.01    | 36.51±0.37 | 1.73±0.05  | 1.79     |
| 1% DIO       | 6.55±0.35                      | 0.80±0.02    | 36.86±0.62 | 1.92±0.08  | 2.01     |
| 2% DIO       | 6.99±0.30                      | 0.82±0.01    | 38.57±0.57 | 2.20±0.06  | 2.28     |
| 3% DIO       | 6.14±0.18                      | 0.81±0.01    | 36.79±0.42 | 1.83±0.05  | 1.89     |
| 1% CN        | 6.42±0.16                      | 0.81±0.01    | 38.68±0.57 | 2.02±0.07  | 2.12     |
| 2% CN        | 5.39±0.31                      | 0.79±0.01    | 35.13±2.67 | 1.50±0.18  | 1.75     |
| 1% DIO+1% CN | 6.43±0.21                      | 0.80±0.01    | 38.02±1.78 | 1.94±0.13  | 2.09     |

**Table S3** Photovoltaic performance of PTB7:BF-PDI<sub>4</sub> based solar cells. The average values are from over eight devices. The D:A ratio is 1:2 (w/w).

| Film treat | $J_{sc}$ (mA/cm <sup>2</sup> ) | $V_{oc}$ (V) | FF (%)     | $\eta$ (%) | Best (%) |
|------------|--------------------------------|--------------|------------|------------|----------|
| none       | 5.84±0.26                      | 0.80±0.01    | 36.20±0.51 | 1.69±0.08  | 1.78     |
| 1%DIO      | 7.21±0.19                      | 0.81±0.01    | 41.65±0.44 | 2.45±0.07  | 2.53     |
| 2%DIO      | 6.44±0.15                      | 0.80±0.01    | 41.97±0.45 | 2.15±0.03  | 2.19     |
| 3%DIO      | 6.61±0.24                      | 0.81±0.01    | 40.26±0.71 | 2.16±0.09  | 2.26     |

**Table S4** Photovoltaic performance of PTB7:BF-NDI<sub>4</sub> based solar cells. The average values are from over eight devices. The D:A ratio is 1:1.5 (w/w).

| Film treat | $J_{sc}$ (mA/cm <sup>2</sup> ) | $V_{oc}$ (V) | FF (%)     | $\eta$ (%) | Best (%) |
|------------|--------------------------------|--------------|------------|------------|----------|
| none       | 2.28±0.05                      | 0.77±0.01    | 33.69±0.76 | 0.59±0.03  | 0.63     |
| 1% DIO     | 3.26±0.11                      | 0.70±0.02    | 37.27±0.97 | 0.85±0.04  | 0.89     |
| 2% DIO     | 3.33±0.16                      | 0.80±0.01    | 37.27±0.65 | 0.99±0.05  | 1.08     |
| 3% DIO     | 3.09±0.10                      | 0.70±0.03    | 37.08±1.07 | 0.81±0.03  | 0.83     |

## 2. Additional figures.

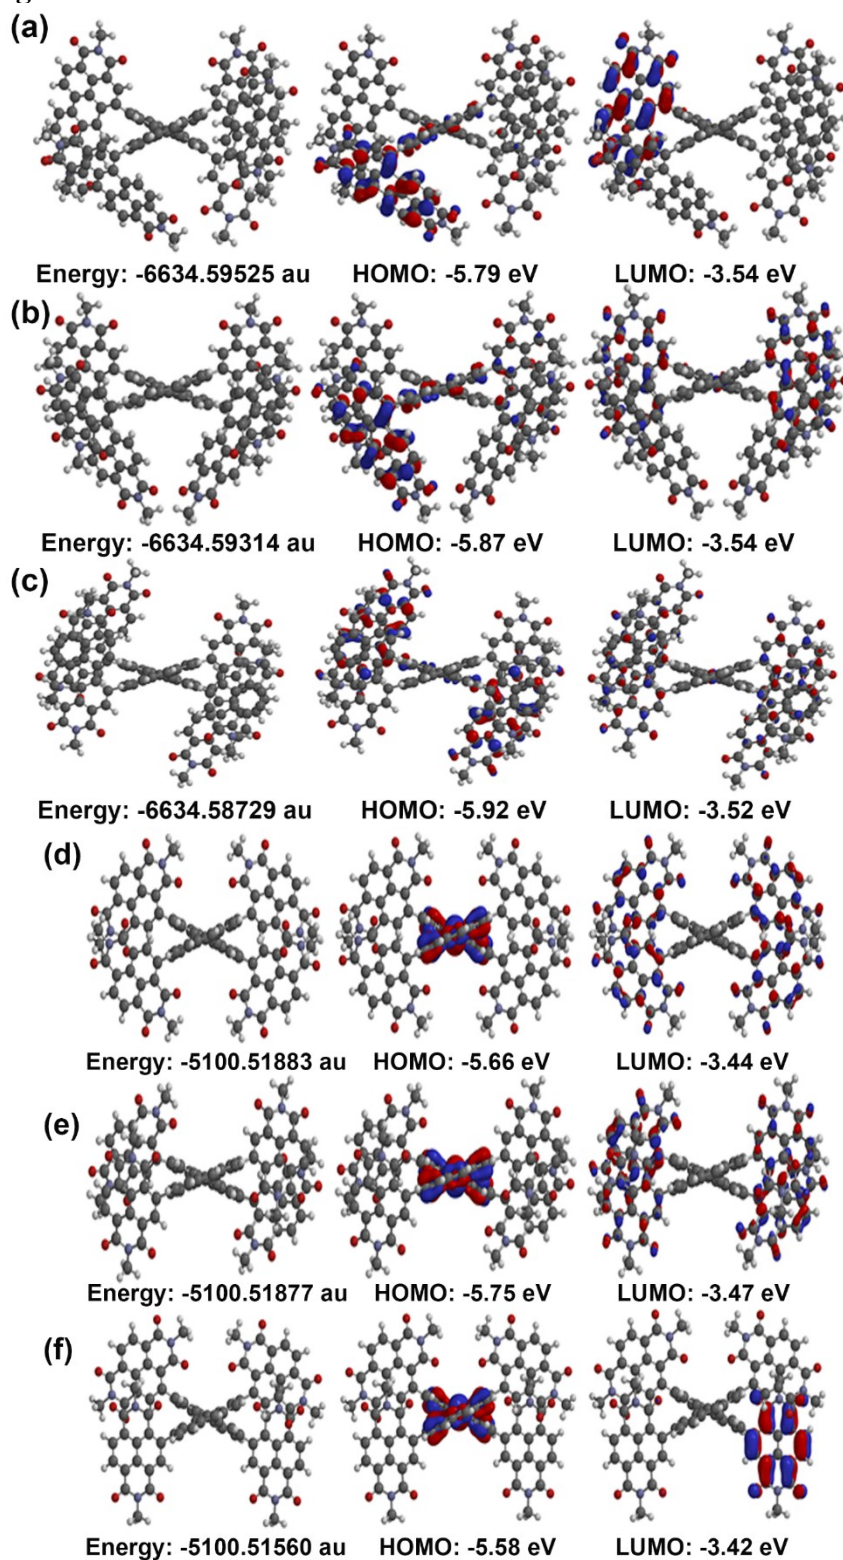

**Figure S1** (a-c) Three possible structural conformations of BF-PDI<sub>4</sub> and their corresponding molecular orbital diagrams; (d-f) three possible structural conformations of BF-NDI<sub>4</sub> and their corresponding molecular orbital diagrams.

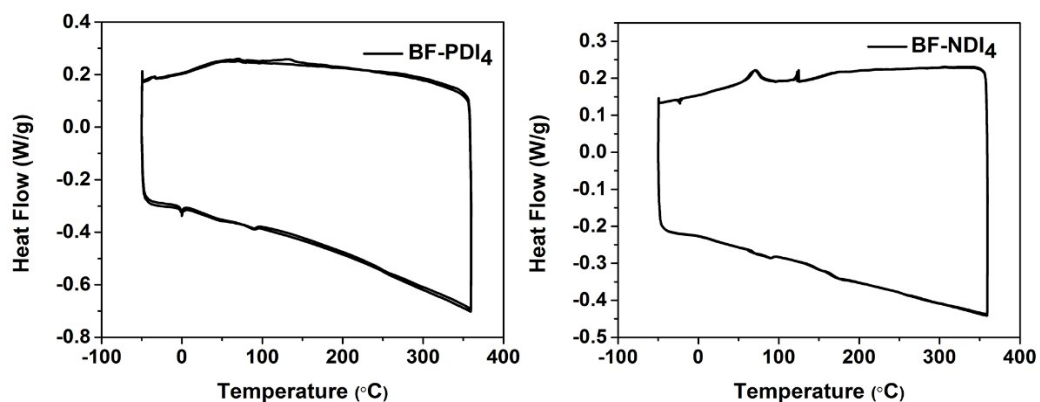

**Figure S2** Differential Scanning Calorimetry curves of BF-PDI<sub>4</sub> and BF-NDI<sub>4</sub>

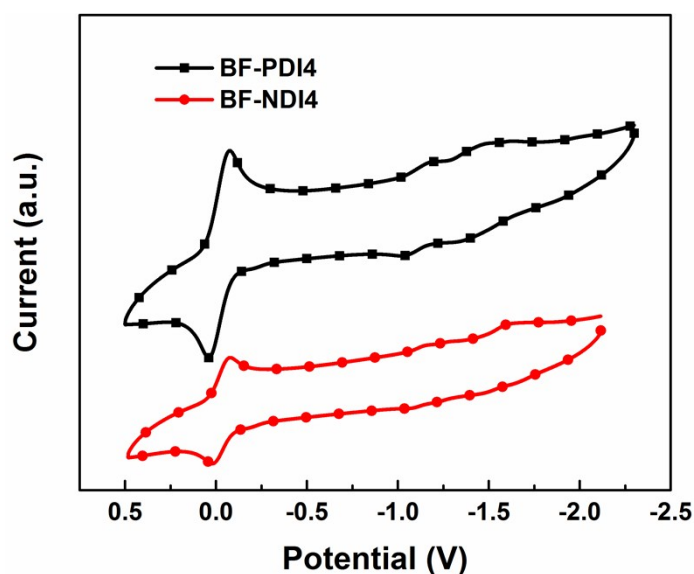

**Figure S3** Cyclic voltammety of BF-PDI<sub>4</sub> and BF-NDI<sub>4</sub> (THF, 0.1 M [nBu<sub>4</sub>N]<sup>+</sup>[PF<sub>6</sub>]<sup>-</sup>, 50 mVs<sup>-1</sup>) with FeCp<sub>2</sub><sup>+0</sup> as an internal reference

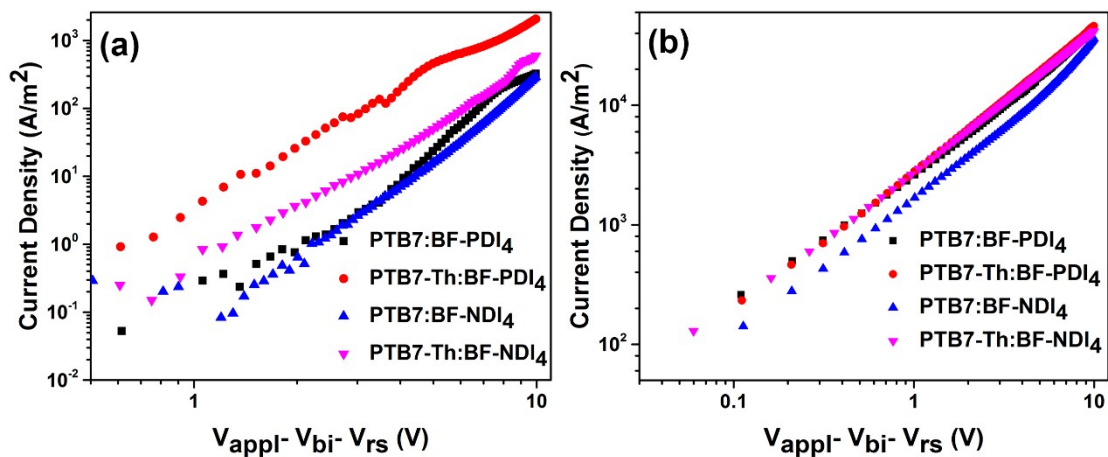

**Figure S4** Current density and voltage (J–V) characteristics of (a) electron-only devices (ITO/ZnO/BHJ/Ca/Al) and (b) hole-only devices (ITO/PEDOT:PSS/BHJ/MoO<sub>3</sub>/Ag).
